# Supplementary material for: Enantio- and diastereoselective polymerization: asymmetric allylic alkylation catalyzed by a planar-chiral Cp′Ru complex
Source: Royal Society of Chemistry journal article supplement (doi:10.1039/c6py00484a), 2016-01-01

**Supplementary Information for**

**Enantio- and Diastereoselective Polymerization: Asymmetric Allylic Alkylation  
Catalyzed by a Planar-Chiral Cp'Ru Complex**

Naoya Kanbayashi, Kazuki Hosoda, Taka-aki Okamura, Sadahito Aoshima and Kiyotaka Onitsuka

Department of Macromolecular Science Graduate School of Science, Osaka University, Toyonaka, Osaka  
560-0043, Japan

onitsuka@chem.sci.osaka-u.ac.jp

naokou@chem.sci.osaka-u.ac.jp

### <sup>1</sup>H NMR Spectrum of 2

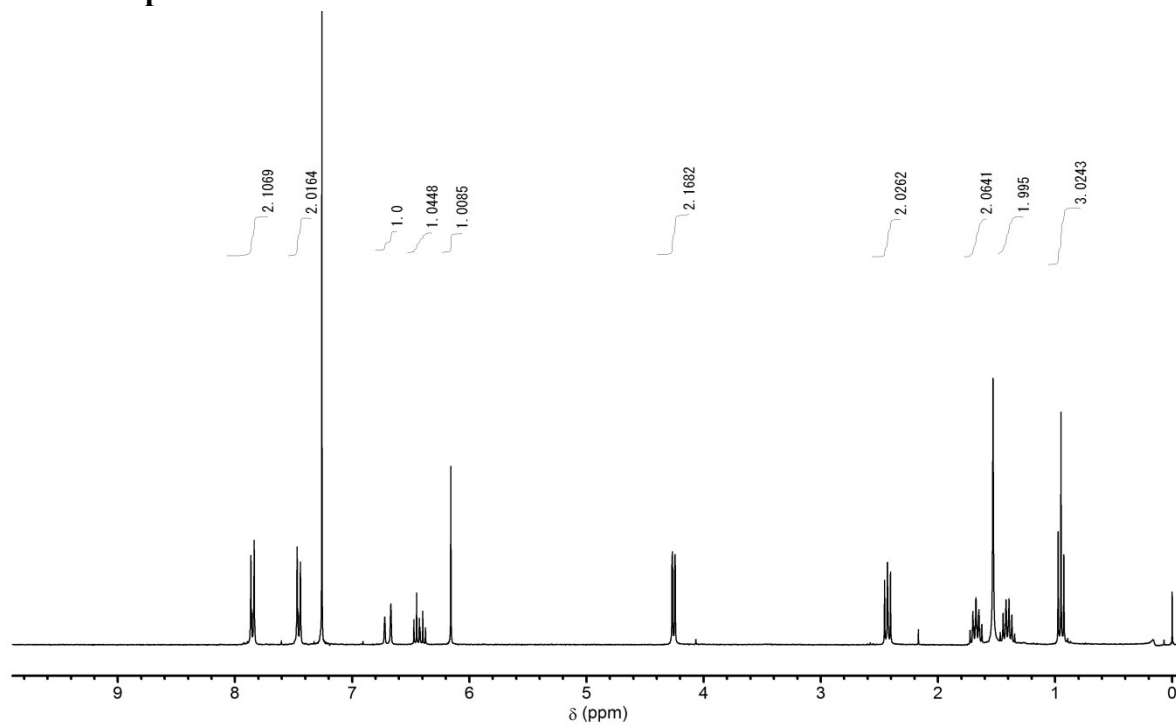

### <sup>1</sup>H NMR Spectrum of poly-2

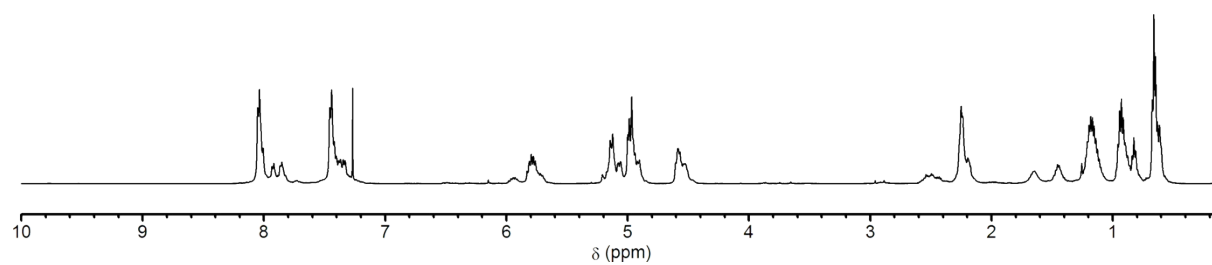

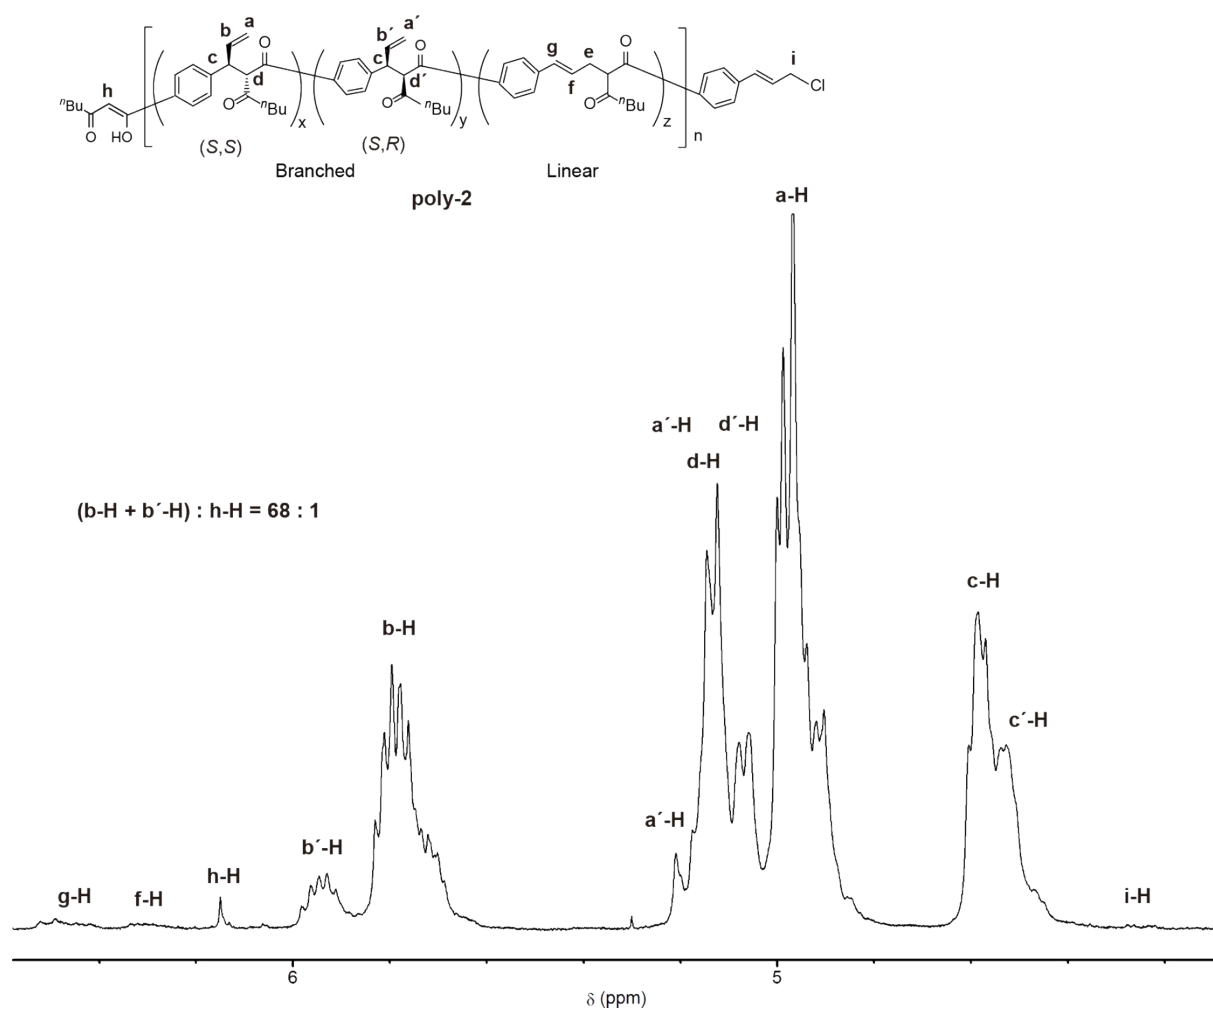

### <sup>13</sup>C NMR Spectrum of poly-2

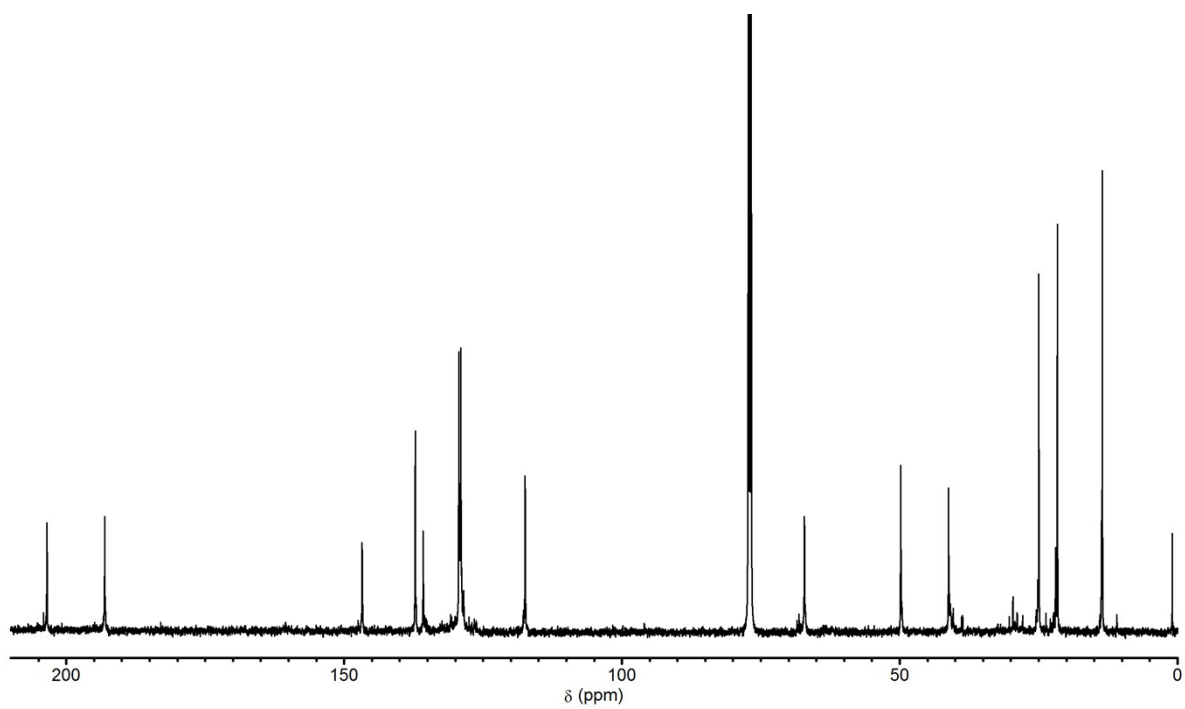

**Simulation of  $^1\text{H}$  NMR spectrum of **6** Using DFT (B3LYP-GIAO/6-311+G(2df,2p)) Calculation**

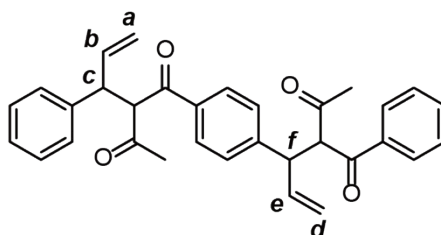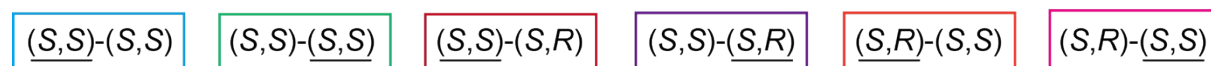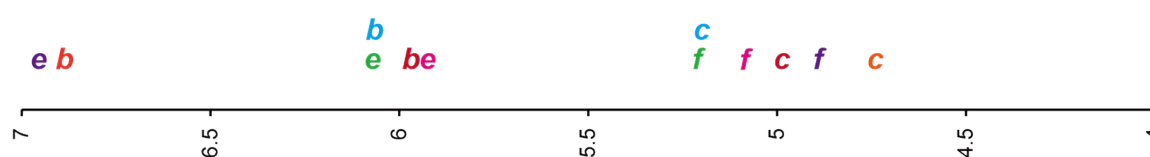

|   | <b>6</b> -( <i>S,S</i> ),( <i>S,S</i> ) | <b>6</b> -( <i>S,S</i> ),( <i>S,R</i> ) | <b>6</b> -( <i>S,R</i> ),( <i>S,S</i> ) |
|---|-----------------------------------------|-----------------------------------------|-----------------------------------------|
| b | 6.08                                    | 6.07                                    | 6.91                                    |
| c | 5.19                                    | 4.99                                    | 4.74                                    |
| e | 5.97                                    | 6.94                                    | 5.96                                    |
| f | 5.19                                    | 4.89                                    | 5.08                                    |

**Assignment of  $^1\text{H}$  NMR Spectrum of Poly-2 Based on DFT (B3LYP-GIAO/6-311+G(2df,2p)) Calculation**

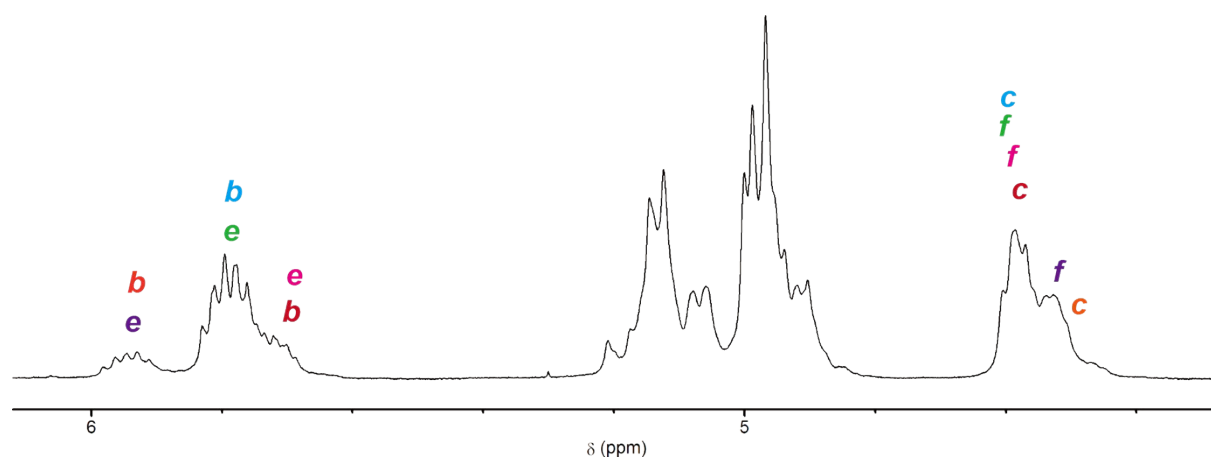

**Time dependence of polymerization degree determined by  $^1\text{H}$  NMR or SEC.**

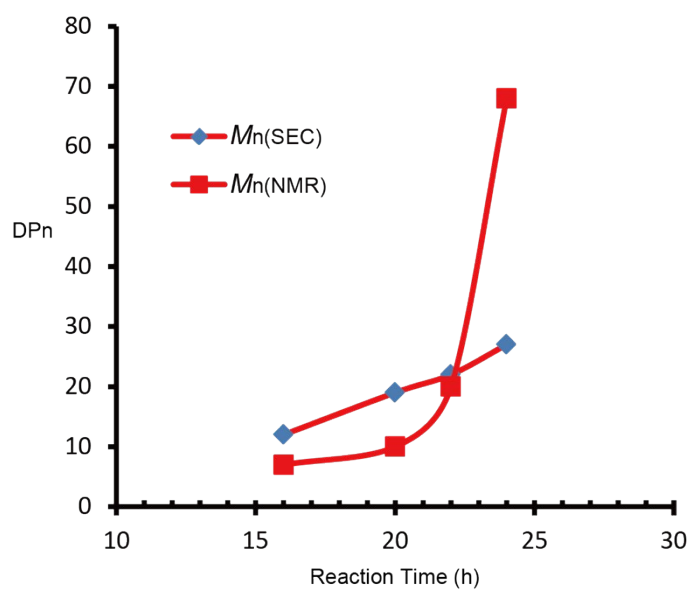

**The SEC spectrum of crude product poly-2 (Table 1, entry 5).**

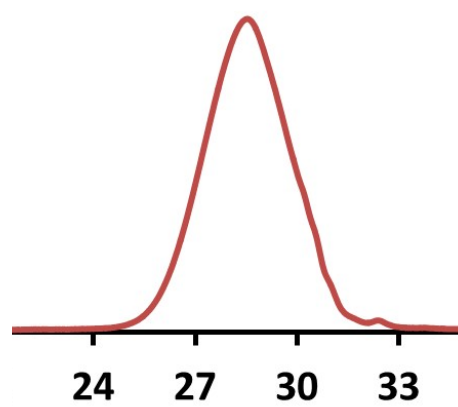

**TD-DFT (B3LYP/6-31G\*\*) simulated CD and UV spectra of 6-(*S,S*)-(*S,S*)**

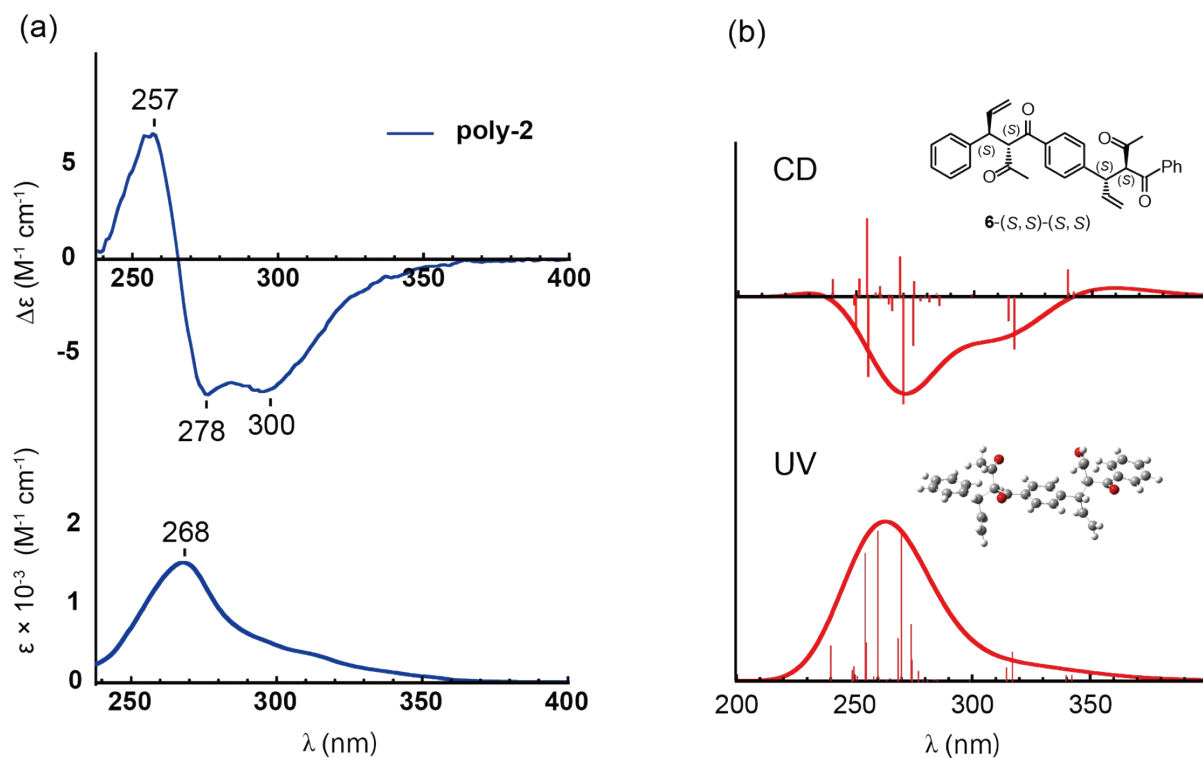

The proposed coordination structure of (*S*)-7. The structures are based on simulated structures of 5-(*S,S*) and 5-(*S,R*).

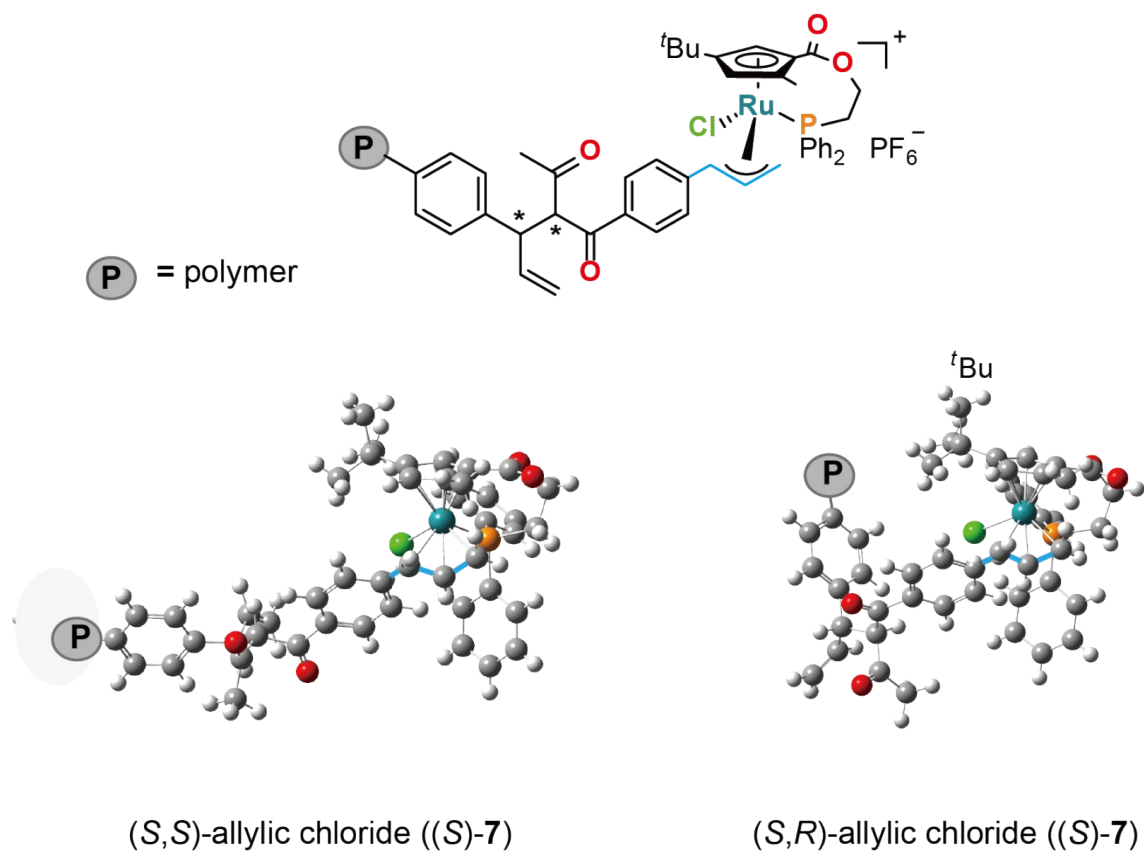

Supplement: c6py00484a1.pdf [file c6py00484a1.pdf]
